# Supplementary material for: Live Cell Detection of Poly(ADP-Ribose) for Use in Genetic and Genotoxic Compound Screens
Source: MDPI journal article supplement (doi:10.3390/cancers14153676), 2022-07-28
Supplement: s1 [file s1]

## Supplement information for:

# Live Cell Detection of Poly(ADP)-Ribose for Use in Genetic and Genotoxic Compound Screens

Christopher A. Koczor <sup>1,2</sup>, Aaron J. Haider <sup>2</sup>, Kate M. Saville <sup>1,2</sup>, Jianfeng Li <sup>1,2</sup>, Joel F. Andrews <sup>2</sup>, Alison V. Beiser <sup>1,2</sup>, and Robert W. Sobol <sup>1,2,\*</sup>

<sup>1</sup> Department of Pharmacology, College of Medicine, University of South Alabama, Mobile, AL 36688, USA; cakoczor@southalabama.edu (C.A.K.); aaronhai@uab.edu (A.J.H.); mkm1325@jagmail.southalabama.edu (K.M.S.); jianfengli@southalabama.edu (J.L.); jandrews@southalabama.edu (J.F.A.); avbeiser@southalabama.edu (A.V.B.)

<sup>2</sup> Mitchell Cancer Institute, University of South Alabama, Mobile, AL 36604, USA

\* Correspondence: [rwsobol@southalabama.edu](mailto:rwsobol@southalabama.edu) (R.W.S.)

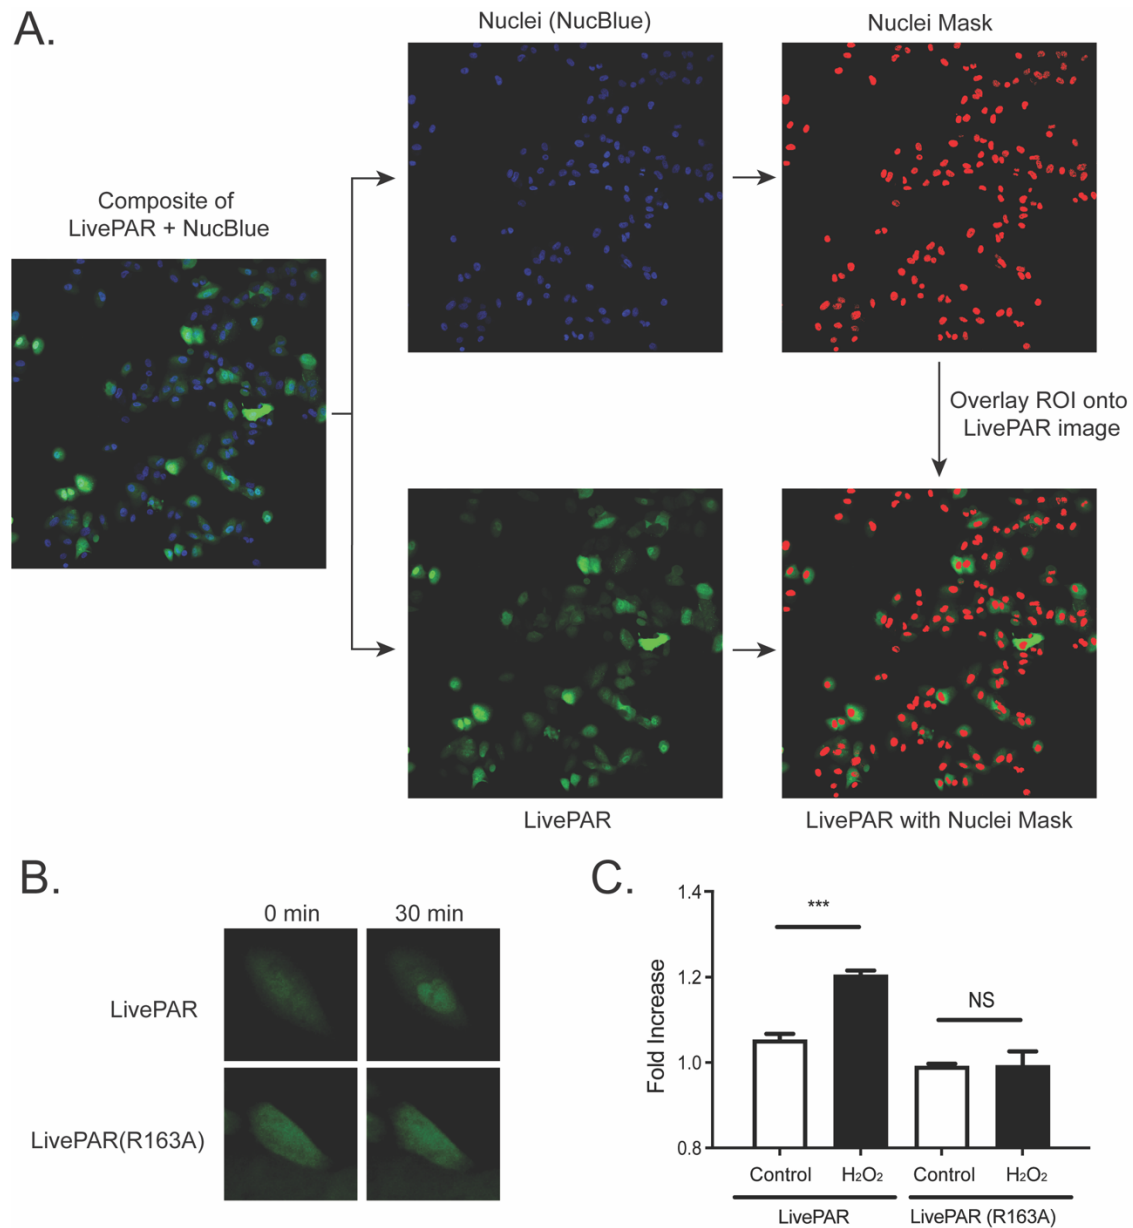

**Figure S1.** LivePAR nuclear enrichment assay. **(A)** Quantitative imaging approach for the LivePAR nuclear enrichment assay. A549 cells expressing LivePAR (green) were pre-treated with NucBlue live cell dye (blue). Images were taken at specific time points both before and after genotoxic treatment. Images from the blue channel were used to identify nuclei (ROIs) that were then used to quantify LivePAR nuclear intensity in the green channel. Each ROI was quantitated individually and were tracked for the duration of the experiment. **(B)** Images of LivePAR enrichment following 30 min H<sub>2</sub>O<sub>2</sub> treatment (250μM) as compared to LivePAR(R163A). **(C)** Quantitation of LivePAR nuclear enrichment following 30 min H<sub>2</sub>O<sub>2</sub> treatment (250μM). Nuclear enrichment was not observed in the LivePAR(R163A) mutant.

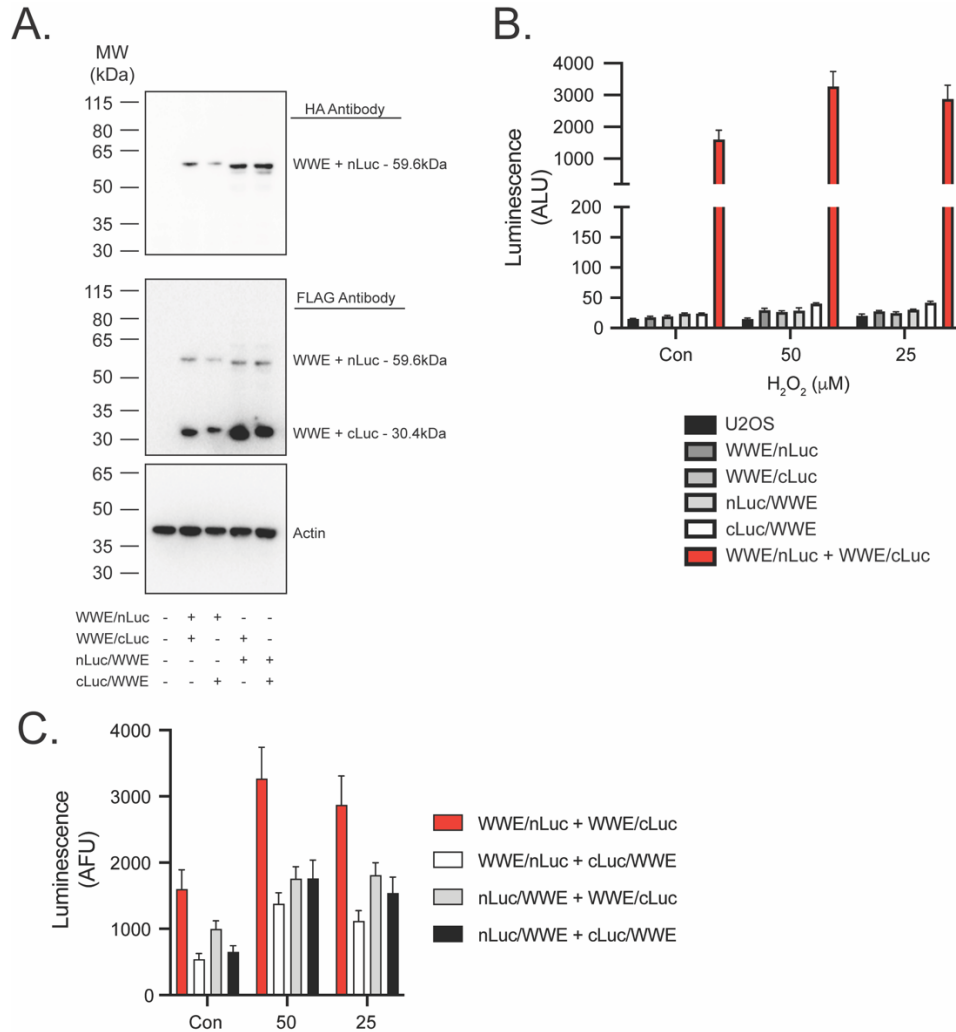

**Figure S2.** Comparison of WWE split luciferase (Luc) individual fusion pairings. **(A)** Expression of WWE fusions with either nLuc or cLuc in U2OS cells. WWE was fused to either the N-terminal side of nLuc or cLuc, or to the C-terminal side of nLuc or cLuc and cloned into single expression cassettes. Four combinations were tested in U2OS cells. **(B)** Raw luminescence of individual WWE split luciferase components tested. **(C)** Raw luminescence of WWE split luciferase pairs. WWE/nLuc paired with WWE/cLuc yielded the greatest total luminescence.

### A. Immunoblots from Figure 3A

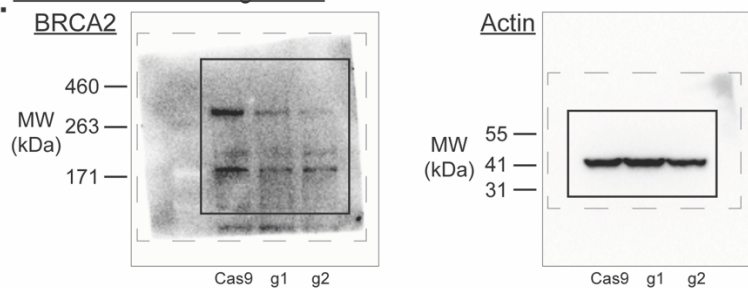

### B. Immunoblots from Figure 5A

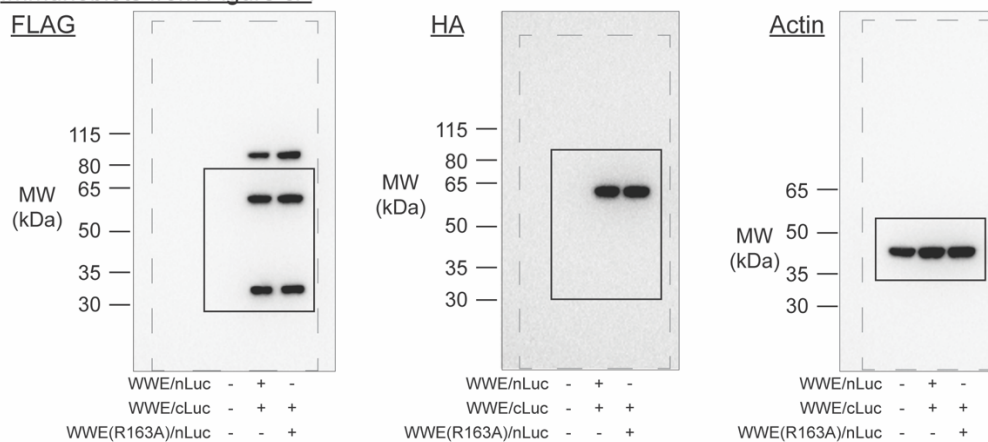

### C. Immunoblots from Figure 5F

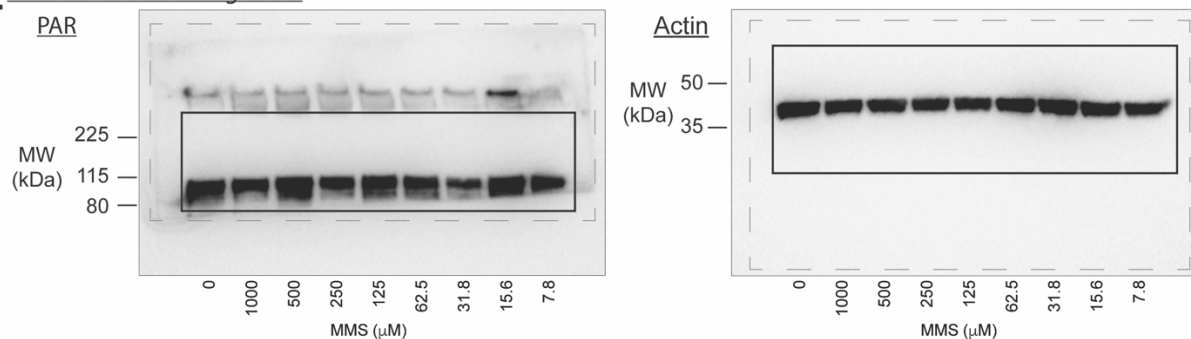

### D. Immunoblots from Figure 5G

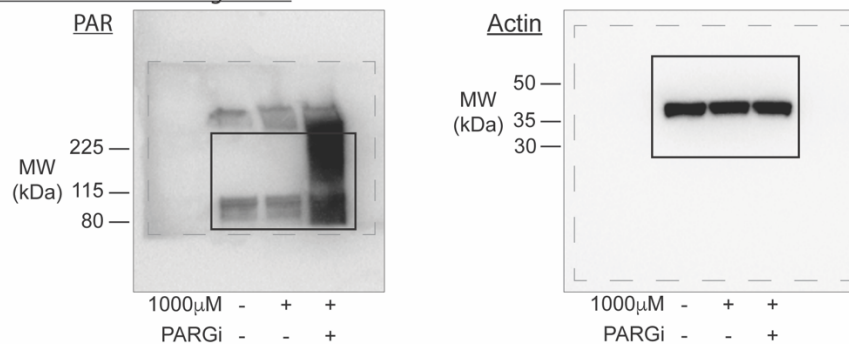

**Figure S3.** Uncropped immunoblot images. Each panel shows the uncropped images of the gel lanes used in the figure mentioned. Gray dotted lines denote the edge of the membrane analyzed; black lines denote the borders of the cropped image displayed in the main figure. (A) Raw data of immunoblots from Figure 3A. (B) Raw data of immunoblots from Figure 5A. (C) Raw data of immunoblots from Figure 5F. (D) Raw data of immunoblots from Figure 5G.

| <b>Table S1: Reagent List</b>                                  | <b>SOURCE</b>                                                     | <b>IDENTIFIER</b> |
|----------------------------------------------------------------|-------------------------------------------------------------------|-------------------|
| <b>Antibodies</b>                                              |                                                                   |                   |
| Mouse anti-PAR (10H) (Immunoblot- 1:1000)                      | Generous gift from Mathias Ziegler (University of Bergen, Norway) | N/A               |
| Mouse anti-beta actin (Immunoblot- 1:2500)                     | Sigma                                                             | Cat# A5441        |
| Rabbit anti-BRCA2 (Immunoblot- 1:500)                          | Abcam                                                             | Cat# ab27976      |
| Mouse anti-HA (Immunoblot- 1:2500)                             | Sigma                                                             | Cat# H3663        |
| Mouse anti-FLAG M2 (Immunoblot- 1:2500)                        | Sigma                                                             | Cat# F1804        |
| Immun-Star Goat anti-mouse-HRP conjugate (Immunoblot- 1:2500)  | Bio-Rad                                                           | Cat# 170-5047     |
| Immun-Star Goat anti-rabbit-HRP conjugate (Immunoblot- 1:2500) | Bio-Rad                                                           | Cat# 170-5046     |
|                                                                |                                                                   |                   |
| <b>Chemicals, peptides, and recombinant proteins</b>           |                                                                   |                   |
| Heat-inactivated fetal bovine serum                            | Bio-Techne                                                        | Cat# S11150H      |
| Penicillin/streptomycin                                        | Thermo Fisher Scientific                                          | Cat# 15140-122    |
| DMEM                                                           | Corning                                                           | Cat# 15-017-CV    |
| L-glutamine                                                    | Thermo Fisher Scientific                                          | Cat# 25030-081    |
| Dimethyl Sulfoxide                                             | Thermo Fisher Scientific                                          | Cat# BP231-1      |
| Puromycin                                                      | Sigma-Aldrich                                                     | Cat# P9620-10ml   |
| Hygromycin                                                     | Thermo Fisher Scientific                                          | Cat# 10687010     |
| Trypsin-EDTA                                                   | Thermo Fisher Scientific                                          | Cat# 25200-056    |
| 0.2µM PVDF                                                     | Bio-Rad                                                           | Cat# 162-0174     |
| 0.45µM Durapore Steriflip Filters                              | Sigma-Aldrich                                                     | Cat# SE1M003M00   |
| Polybrene                                                      | Sigma-Aldrich                                                     | Cat# 107689       |
| Protease inhibitor cocktail tablets                            | Thermo Fisher Scientific                                          | Cat# 88666        |
| Blotting grade non-fat dry milk                                | Bio-Rad                                                           | Cat# 170-6404     |
| Nupage 4-12% Bis-Tris gel                                      | Invitrogen                                                        | Cat# NP0323BOX    |
| Nupage 3-8% Tris-Acetate gel                                   | Invitrogen                                                        | Cat# EA0378BOX    |
| Clarity Western ECL Substrate                                  | Bio-Rad                                                           | Cat# 1705060      |
| SuperSignal West Femto Maximum Sensitivity Substrate           | Thermo Fisher Scientific                                          | Cat# 34095        |
| DC protein assay kit                                           | Bio-Rad                                                           | Cat# 5000112      |
| HT PARP In Vivo Pharmacodynamic ELISA Kit II                   | Bio-Techne                                                        | Cat# 4520B-096-K  |
| Hydrogen Peroxide (9.8M)                                       | Sigma-Aldrich                                                     | Cat# H1009        |
| Methylmethanesulfonate (MMS)                                   | Sigma-Aldrich                                                     | Cat# 129925       |
| Formaldehyde solution (37%)                                    | Thermo Fisher Scientific                                          | Cat# BP531-500    |
| NucBlue Live Cell ReadyProbes (Hoechst 33342)                  | Thermo Fisher Scientific                                          | Cat# R37605       |
| NucBlue Fixed Cell ReadyProbes (DAPI)                          | Thermo Fisher Scientific                                          | Cat# R37606       |
| Alexa Fluor 647 Phalloidin                                     | Thermo Fisher Scientific                                          | Cat# A22287       |
| TransIT-X2 Transfection Reagent                                | Mirus Bio                                                         | Cat# MIR 6005     |
| IVISbrite D-luciferin                                          | Perkin Elmer                                                      | Cat# 122799       |
| ABT-888 (Veliparib)                                            | Selleckchem                                                       | Cat# S1004        |
| PDD00017273                                                    | Sigma-Aldrich                                                     | Cat# SML1781      |
| PDD00017238                                                    | Bio-Techne/Tocris                                                 | Cat# 7007         |
| Bleomycin                                                      | Selleckchem                                                       | Cat# S1214        |

|                                                                                                                                                                                                       |                                                                        |                   |
|-------------------------------------------------------------------------------------------------------------------------------------------------------------------------------------------------------|------------------------------------------------------------------------|-------------------|
| Hydroxyurea                                                                                                                                                                                           | Sigma                                                                  | Cat# H8627        |
| Calicheamicin                                                                                                                                                                                         | Thermo Fisher Scientific                                               | Cat# 50-202-9283  |
| AZD6738                                                                                                                                                                                               | Selleckchem                                                            | Cat# S7693        |
| Doxorubicin                                                                                                                                                                                           | Selleckchem                                                            | Cat# S1208        |
| Etoposide                                                                                                                                                                                             | Selleckchem                                                            | Cat# S1225        |
| Gemcitabine                                                                                                                                                                                           | Selleckchem                                                            | Cat# S1714        |
| MNNG                                                                                                                                                                                                  | Sigma-Aldrich                                                          | Cat# 129941       |
|                                                                                                                                                                                                       |                                                                        |                   |
| <b>Cell Lines</b>                                                                                                                                                                                     |                                                                        |                   |
| U2OS<br>(Human osteosarcoma tumor cell line)                                                                                                                                                          | ATCC                                                                   | Cat# HTB-96       |
| A549<br>(Human adenocarcinoma tumor cell line)                                                                                                                                                        | ATCC                                                                   | Cat# CCL-185      |
| PEO1                                                                                                                                                                                                  | Generous gift from<br>Toshi Taniguchi (Fred<br>Hutchinson CRC,<br>USA) | [1]               |
| C4-2                                                                                                                                                                                                  | Generous gift from<br>Toshi Taniguchi (Fred<br>Hutchinson CRC,<br>USA) | [1]               |
|                                                                                                                                                                                                       |                                                                        |                   |
| <b>Recombinant DNA</b>                                                                                                                                                                                |                                                                        |                   |
| pLentiCRISPRv2<br>(Cas9 plus cloning site for gRNA; contains a puromycin resistance cassette)                                                                                                         | [2]                                                                    | Addgene (#52961)  |
| pLentiCRISPRv2-Con<br>(Cas9 plus control gRNA; contains a puromycin resistance cassette)                                                                                                              | Generous gift from Wim<br>Vermeulen (Erasmus<br>MC, NL)                | [3]               |
| pLENTI-CRISPR-V2-BRCA2-KO-g1<br>(Cas9 plus BRCA2 gRNA #1; contains a puromycin resistance cassette)                                                                                                   | Generous gift from Wim<br>Vermeulen (Erasmus<br>MC, NL)                | [3]               |
| pLENTI-CRISPR-V2- BRCA2-KO-g2<br>(Cas9 plus BRCA2 gRNA #2; contains a puromycin resistance cassette)                                                                                                  | Generous gift from Wim<br>Vermeulen (Erasmus<br>MC, NL)                | [3]               |
| pLV-EF1A-LivePAR-Hygro<br>(PAR binding domain with EGFP tag & a hygromycin resistance cassette)                                                                                                       | [4]                                                                    | Addgene (#176063) |
| pLV-EF1A-LivePAR(R163A)-Hygro<br>(EGFP fused to the C-terminus of a WWE domain containing a point mutation to<br>convert Arg163 to Ala & a hygromycin resistance cassette)                            | This study                                                             | Addgene (#187609) |
| pLV-EF1A-WWE-HA-nLuc-FLAG-T2A-WWE-myc-cLuc-FLAG-<br>IRES-Puro<br>(Split luciferase single construct with WWE-nLuc co-expressed with WWE-cLuc,<br>with a puromycin resistance cassette)                | This study                                                             | Addgene (#187611) |
| pLV-EF1A-WWE(R163A)-HA-nLuc-FLAG-T2A-WWE-myc-cLuc-<br>FLAG-IRES-Puro<br>(Split luciferase single construct with WWE(R163A)-nLuc co-expressed with WWE-<br>cLuc, with a puromycin resistance cassette) | This study                                                             | Addgene (#187612) |
|                                                                                                                                                                                                       |                                                                        |                   |

| Software and Algorithms                        |                                               |                                                                                             |
|------------------------------------------------|-----------------------------------------------|---------------------------------------------------------------------------------------------|
| Image J                                        | Image J 1.48v                                 | <a href="https://imagej.nih.gov/ij/1.6.0_65">https://imagej.nih.gov/ij/1.6.0_65</a>         |
| FIJI                                           | <a href="http://fiji.sc/">http://fiji.sc/</a> | [5]                                                                                         |
| Adobe Illustrator (for preparation of figures) | Adobe Systems                                 | Version 2022                                                                                |
| GraphPad Prism                                 | GraphPad                                      | Version 9<br>(Mac OS X)                                                                     |
| MIDAS                                          | [4]                                           | <a href="https://doi.org/10.5281/zenodo.5534950">https://doi.org/10.5281/zenodo.5534950</a> |
| NIS-Elements                                   | Nikon Instruments                             | Versions 4.51 and 5.11                                                                      |
| Comet Analysis Software (CAS)                  | BioTechne                                     | Version 1.3d                                                                                |

## References

1. Sakai, W.; Swisher, E.M.; Jacquemont, C.; Chandramohan, K.V.; Couch, F.J.; Langdon, S.P.; Wurz, K.; Higgins, J.; Villegas, E.; Taniguchi, T. Functional restoration of BRCA2 protein by secondary BRCA2 mutations in BRCA2-mutated ovarian carcinoma. *Cancer Res* **2009**, *69*, 6381-6386, doi:10.1158/0008-5472.CAN-09-1178.
2. Sanjana, N.E.; Shalem, O.; Zhang, F. Improved vectors and genome-wide libraries for CRISPR screening. *Nat Methods* **2014**, *11*, 783-784, doi:10.1038/nmeth.3047.
3. Slyskova, J.; Sabatella, M.; Ribeiro-Silva, C.; Stok, C.; Theil, A.F.; Vermeulen, W.; Lans, H. Base and nucleotide excision repair facilitate resolution of platinum drugs-induced transcription blockage. *Nucleic Acids Res* **2018**, *46*, 9537-9549, doi:10.1093/nar/gky764.
4. Koczor, C.A.; Saville, K.M.; Andrews, J.F.; Clark, J.; Fang, Q.; Li, J.; Al-Rahahleh, R.Q.; Ibrahim, M.; McClellan, S.; Makarov, M.V.; et al. Temporal dynamics of base excision/single-strand break repair protein complex assembly/disassembly are modulated by the PARP/NAD(+)/SIRT6 axis. *Cell reports* **2021**, *37*, 109917, doi:10.1016/j.celrep.2021.109917.
5. Schindelin, J.; Arganda-Carreras, I.; Frise, E.; Kaynig, V.; Longair, M.; Pietzsch, T.; Preibisch, S.; Rueden, C.; Saalfeld, S.; Schmid, B.; et al. Fiji: an open-source platform for biological-image analysis. *Nat Methods* **2012**, *9*, 676-682, doi:10.1038/nmeth.2019.
